# Supplementary material
Source: Research Square preprint supplement (doi:10.21203/rs.3.rs-9126060/v1)
Supplement: Supplementary file 1 [file 35c16bc53708aeb2a1fe1ba3.doc]

Supporting Information

****Materials and Methods****

****1. Determination of Mitochondrial Concentration in Plasma****
A 200 µL aliquot of plasma was centrifuged at 1600 × g for 10 minutes at 4°C to obtain cell-free plasma. Genomic DNA was subsequently extracted using the QIAprep Spin Miniprep Kit. Quantification of mitochondrial DNA was performed as described previously. In brief, mitochondrial DNA was amplified using amfiSure qGreen Q-PCR Master Mix with the following primers: forward 5′-TCTCCAGTGGCCAACAGTGTT-3′ and reverse 5′-GCCCTCTTGTTCCCATCAAC-3′. Amplification and data analysis were carried out using the CFX Connect Real-Time PCR Detection System and its accompanying software. The mitochondrial concentration was determined by dividing the amount of mitochondrial DNA (ng/mL) by the DNA content per single mitochondrion (approximately 5 × 10⁻⁸ ng).

****2. Enzyme-Linked Immunosorbent Assay****
Plasma samples were quantitatively analyzed for anti-cardiolipin antibodies using a Human Anti-Cardiolipin IgG ELISA Kit. Additionally, the levels of IL-6, IL-1β, CCL3, CXCL2, histone H3, and histone H4 in intestinal tissue homogenate supernatants were measured using commercial ELISA kits. Blood collected from the inferior vena cava was diluted with citrate dextrose anticoagulant, centrifuged, and stored at -20°C for later use. After centrifugation of plasma samples and in vitro samples, DNA-histone complexes were quantitatively detected using the Cell Death Detection ELISA Plus kit according to the manufacturer's instructions.

****3. Flow Cytometry****

****Human Intestinal Immune Cells:**** Discarded human intestinal tissue (approximately 5 cm²) was obtained within one hour after surgery and processed with slight modifications to the method described by Geem et al. Underlying tissue was removed using curved surgical scissors, and the tissue was then cut into small pieces with a scalpel. The tissue was first incubated with DTT at 37°C twice for 15 minutes each, then digested with Type IV collagenase 2-3 times for 30 minutes each. Tissue fragments were filtered through a 100 μm cell strainer, transferred to a new 50 mL centrifuge tube with 1 mL digestion solution, and shaken at 37°C for 25 minutes. Mononuclear cells were enriched using Ficoll-Paque gradient centrifugation, followed by cell phenotype staining or sorting. Cell yield from each digestion was counted with a hemocytometer after Ficoll separation. The resulting cells were filtered through a 40 μm cell strainer, centrifuged, and resuspended in PBS for antibody labeling. Human granulocytes were identified by CD11b staining, lymphocytes by CD3 antibody, and macrophages by co-staining with CD68 and HLA-DR antibodies.

****Mouse Intestinal Immune Cells:**** Neonatal mice were euthanized at 24, 48, and 72 hours after infection. The intestine was dissected, Peyer's patches were removed, and specimens were placed in RPMI medium for Percoll gradient separation. As previously described, the epithelial layer and lamina propria were separated on Percoll gradients. The percentage of different immune cells recruited to the lamina propria was determined by staining with fluorescently dye-conjugated primary antibodies. Lymphocytes were identified by CD3 staining, neutrophils by Gr-1 antibody, and macrophages by F4/80 antibody. Mouse IgG isotype-matched antibodies were used as controls. Cells were washed, resuspended, and detected using a Beckman Coulter CytoFLEX flow cytometer, and analyzed using FlowJo software V10. Each sample contained at least 10⁵ cells for analysis.

****Neutrophil-Platelet Aggregates:**** To quantify neutrophil-platelet aggregates (NPAs), whole blood collected in FACS tubes was incubated with an Fc receptor blocker for 15 minutes. Erythrocytes were lysed, and remaining cells were fixed using a red blood cell lysis/fixation solution. After incubation, mouse neutrophils and platelets were stained with CD11b, CD41, and Ly6G, and NPAs were detected by flow cytometry. Human neutrophils and platelets were stained with CD66, CD16, and CD41. After centrifugation, cells were washed and analyzed on a BioRad-ZE5 flow cytometer. The percentage of NPAs was calculated using FlowJo software as the percentage of CD66+, CD16+, and CD41+ triple-positive cells among all CD66+ and CD16+ cells. Platelet activation was assessed by detecting P-selectin positive platelets.

****Platelet Functional Assays:**** The purity of platelet preparations was assessed by flow cytometry using FITC-labeled anti-human CD41a and PE-labeled anti-human CD45 antibodies. Platelet activity markers, including caspase-1, caspase-3/7, LC3B, and GSDMD, were detected using the Pyroptosis/Caspase-1 Detection Kit, FAM-FLICA Caspase-3/7 Detection Kit, FLICA 660 Caspase-3/7 Detection Kit, LC3B antibody, and Alexa Fluor 594-labeled anti-rabbit IgG secondary antibody. Data were collected from 20,000 platelets using a BD FACSCanto and analyzed using FlowJo-V10 software.

****Other Cellular Analyses:**** After staining with CD11b and Ly6G, the different immune cells were harvested, fixed, permeabilized, and then stained with an anti-myeloperoxidase (MPO) antibody (Abcam, UK, 1:500 dilution) and analyzed with CytExpert for DxFlex. Besides, we detected reactive oxygen species (ROS) content in cells using a dihydroethidium fluorescence probe. The detailed methods had been outlined in our previous study [14]. For neutrophil determination in peritoneal lavage fluid, peritoneal cell suspensions were first blocked with anti-CD16/32 (BioLegend, 1:100), followed by staining with monoclonal antibodies against CD11b (BioLegend, 1:100) conjugated with FITC and lymphocyte antigen six complex locus G (Ly6G, BioLegend, 1:100) conjugated with APC. After washing and resuspending, the cell populations were analyzed using an Attune Nxt flow cytometer (Thermo Fisher Scientific, Waltham, MA, USA). At least 10,000 cells were collected for analysis.

****4. NET Quantification Assay (MPO-DNA and dsDNA)****
MPO-DNA complexes and double-stranded DNA (dsDNA) in human/mouse plasma and culture medium supernatants were detected using an anti-MPO polyclonal antibody combined with the Cell Death Detection ELISA kit, and the Quant-iT PicoGreen dsDNA reagent, respectively, according to the manufacturers' protocols. Data are expressed as percentage of control ± standard deviation, with the control group set to 100%.

****5. In Vitro Neutrophil-Platelet Co-culture Bactericidal Assay****
Fresh overnight cultured Escherichia coli and Staphylococcus aureus were resuspended in PBS and opsonized with 10% mouse serum. Purified wild-type (WT) or Ip6k1-knockout (KO) neutrophils were co-incubated with WT or Ip6k1-KO platelets and bacteria for 1 hour with intermittent shaking. At each time point, cells were lysed with distilled water, diluted, and plated on LB agar or blood agar plates. Colony forming units (CFUs) were counted after overnight incubation at 37°C. Cell-free bacterial suspensions served as input controls. In vitro bactericidal capacity was reflected by the reduction in bacterial CFUs after incubation.

****6. Polyphosphate Extraction and Determination****
Polyphosphate (polyP) was extracted from platelets using perchloric acid and quantified by measuring the residual orthophosphate released after treatment with recombinant exopolyphosphatase (ppX). Briefly, platelets were precipitated from platelet-rich plasma, subjected to acid extraction, neutralized, and centrifuged. Supernatants were incubated overnight with or without recombinant ppX to completely hydrolyze polyP. Released orthophosphate was reacted with malachite green reagent at room temperature for 10 minutes, and absorbance was read at 650 nm. Orthophosphate contributed by polyP was determined by calculating the difference in orthophosphate content between enzyme-digested and undigested extracts of the same sample. When isolating polyP from neutrophil-platelet co-culture supernatants, the supernatant was first treated with proteinase K, then extracted with a phenol/chloroform mixture. The aqueous phase was extracted with chloroform. PolyP was precipitated with barium acetate and quantified as described above.

****7. Immunohistochemical Analysis****
Immunohistochemical analysis was conducted on paraffin-embedded distal ileum tissue samples from both human and murine subjects. Tissue sections (5 µm thick) were processed through deparaffinization, rehydration, and washing. For the detection of human Muc2, rabbit polyclonal primary antibodies specific to this protein (from Proteintech Group, China) were applied at an appropriate dilution, followed by overnight incubation. Sections were then incubated with corresponding secondary antibodies, and the immunoreaction was visualized using 3,3'-diaminobenzidine (DAB) substrate (Life Technologies, Carlsbad, CA, USA). Slides were counterstained with hematoxylin and examined under a Nikon 55I microscope (Nikon, Tokyo, Japan).

****8. Neutrophil Accumulation in Peritoneal Lavage Fluid****
The mice were anesthetized as described previously. After 24 hours, mice were euthanized with CO₂. Pre-cooled sterile PBS was injected into the peritoneal cavity. The abdomen was gently massaged for 1-2 minutes to dislodge peritoneal cells into the fluid. The lavage fluid was slowly aspirated back, collecting as much as possible; the procedure could be repeated 2-3 times if necessary. After centrifugation of the lavage fluid, total cell numbers were counted using a hemocytometer. Cytocentrifuge preparations of cells were stained for leukocyte differential counting. Neutrophils were identified based on their segmented nuclear morphology, and the percentage of neutrophils was calculated. Total neutrophil numbers were calculated accordingly.

****9. Mitochondrial Function Assay****
Mitochondrial membrane potential was assessed by flow cytometry using tetramethylrhodamine methyl ester (TMRM). Reactive oxygen species levels were detected using a Mitochondrial ROS Detection Kit according to the manufacturer's instructions. Mitochondrial superoxide was labeled with MitoSOX Red. Purified platelet suspensions were incubated with MitoTempo for 1 hour, and then caspase-1 activity was detected by flow cytometry.

****10. Real-Time Quantitative PCR (RT-qPCR)****
Total RNA was extracted from freshly isolated intestinal tissue using TRIzol reagent. One microgram of RNA was subjected to reverse transcription and amplification. Relative gene expression levels were determined using specific primers by the ΔΔCt method.

****11. Bacterial Translocation Assessment****
Venous blood and mesenteric lymph nodes from experimental animals were collected, homogenized under sterile conditions, and inoculated on agar medium containing 5% sheep blood to assess total aerobic bacterial load. Some samples were also inoculated on BBL Brucella agar containing 5% horse blood. Plates were incubated at 37°C under aerobic or anaerobic conditions for 48-72 hours, and colony forming units (CFUs) were counted after incubation.

****12. Endotoxin Assay****
Lipopolysaccharide (LPS) concentrations were precisely measured using photometric detection test kits from Beijing Jinshan Science and Technology Co., Ltd. (Beijing, China), in accordance with the manufacturer's protocols. A detection threshold of 10 picograms per milliliter (pg/mL) was established after thorough analysis of the data, consistent with the manufacturer's guidelines [2].

****13. In Vivo Intestinal Permeability Measurement****
The in vivo assessment of intestinal permeability was conducted as detailed in prior research [2]. Young animals were administered fluorescein isothiocyanate (FITC)-labeled dextran (70 kDa variant, Sigma, St. Louis, MO, USA) via gavage at a dosage of 40 mg per 100 grams of body weight. Four hours post-administration, the pups were humanely euthanized, and blood samples were collected for analysis. Serum fluorescence concentration was quantified, providing a metric of intestinal permeability by measuring the ingress of FITC-dextran into the bloodstream.

****14. Secretory Immunoglobulin A (SIgA) and β-Defensin-2 Measurements****
Intestinal mucus was collected and analyzed using a meticulous approach. The intestinal lumen was carefully excised, ensuring the integrity of the mucosal layer. It was then flushed with a buffer solution containing 0.02% sodium azide to effectively wash out and collect the mucus. The mucosal components were assessed for the quantification of secretory immunoglobulin A (SIgA) and β-defensin-2 using highly specific enzyme-linked immunosorbent assay (ELISA) kits from Shanghai Huzhen Biotechnology (Shanghai, China), strictly following the manufacturer's protocols. The data were normalized relative to the total protein content of the mucus.
